# Supplementary material for: Monitoring of chromosome dynamics of single yeast cells in a microfluidic platform with aperture cell traps
Source: Royal Society of Chemistry journal article supplement (doi:10.1039/c5lc01422k), 2016-01-01
Supplement: c5lc01422k7.pdf [file c5lc01422k7.pdf]

## Supplementary Information

### Monitoring of Chromosome Dynamics of Single Yeast Cell in a Microfluidic Platform with Aperture Cell Traps

Si Hyung Jin,<sup>a</sup> Sung-Chan Jang,<sup>a</sup> Byungjin Lee,<sup>a</sup> Heon-Ho Jeong,<sup>a</sup> Seong-Geun Jeong,<sup>a</sup> Sung Sik Lee,<sup>\*b, c</sup> Keun Pil Kim<sup>d</sup> and Chang-Soo Lee<sup>\*a</sup>

<sup>a</sup> Department of Chemical Engineering, Chungnam National University, 99 Daehak-ro, Yuseong-Gu, Daejeon, 305-764, Republic of Korea. E-mail: rhadum@cnu.ac.kr

<sup>b</sup> Institute of Biochemistry, ETH Zürich, Zürich, CH 8093, Switzerland. E-mail: leesu@ethz.ch

<sup>c</sup> Scientific Center for Optical and Electron Microscopy (ScopeM), ETH Zürich, Zürich, CH-8093, Switzerland.

<sup>d</sup> Department of Life Sciences, Chung-Ang University, Seoul, 156-756, Republic of Korea.

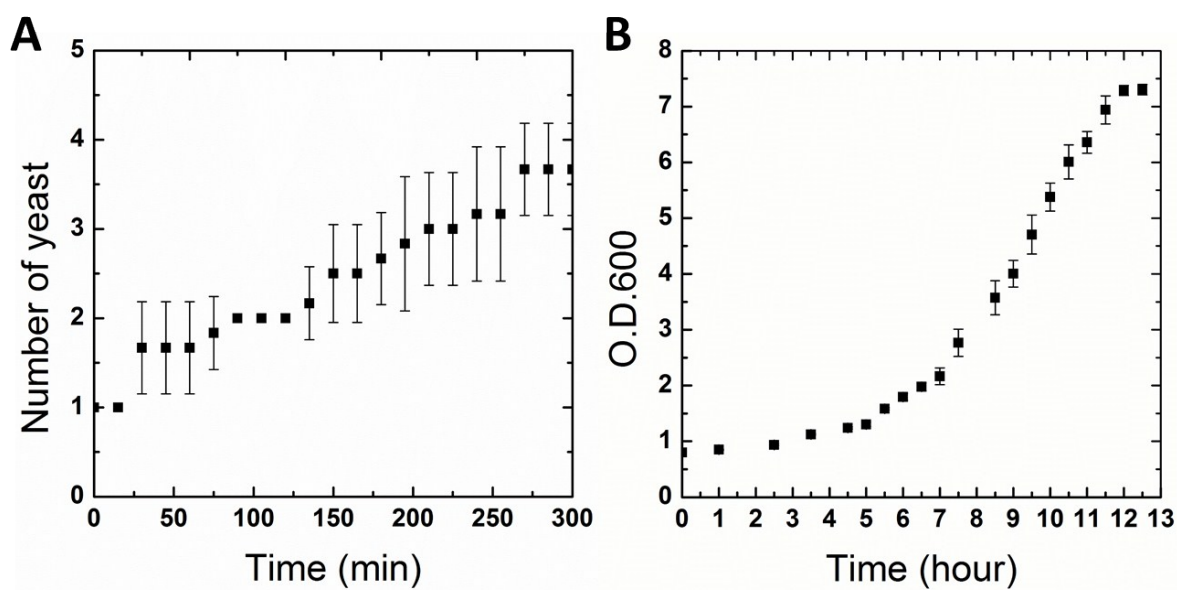

**Fig. S1** Growth curve of the KKY 619 strain. (A) Single cell growth in a microfluidic device with aperture cell traps. (B) Growth curve of the KKY 619 strain in conventional flask culture. Error bar indicates the standard deviations.

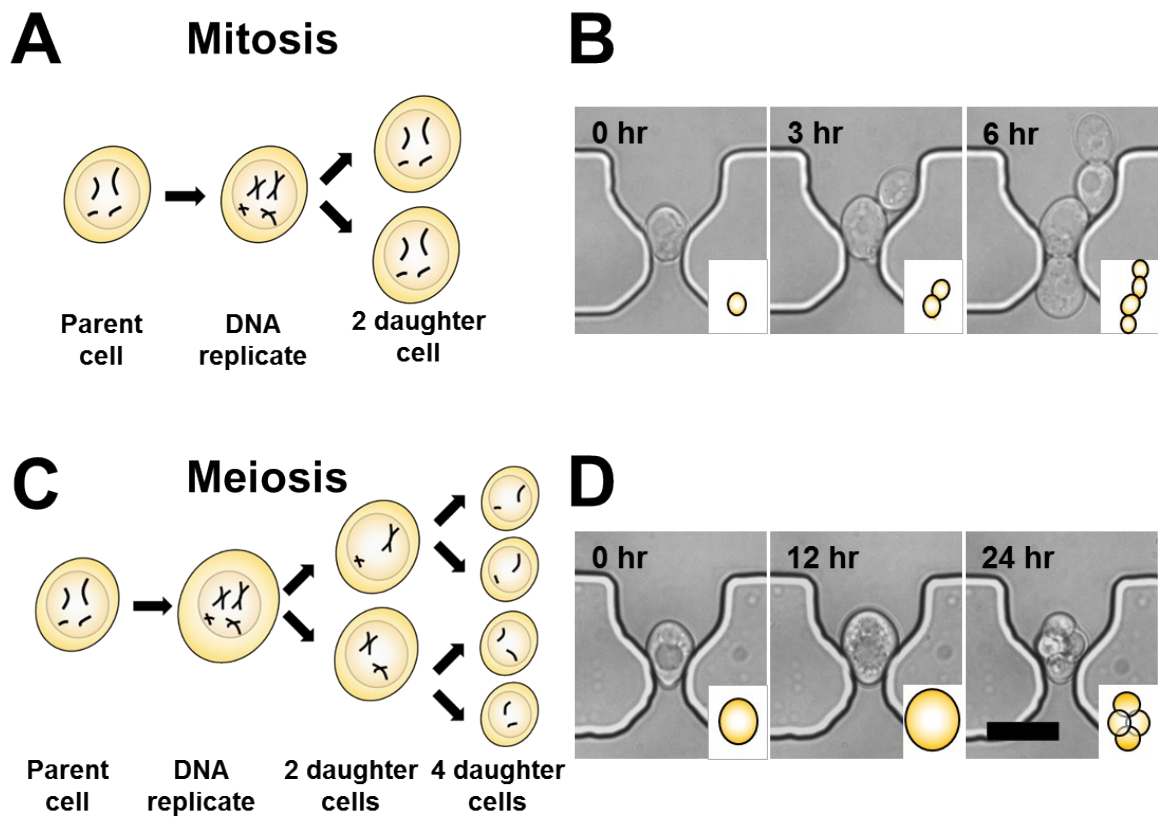

**Fig. S2** (A) Example of mitosis in YPD medium in the microfluidic device. (B) High-resolution images are taken using a 100X oil-immersion objective ( $N.A. = 1.45$ ). Mitosis produces two diploid daughter cells, genetically identical to the parent cell. (C) Example of meiosis in SPM medium in the microfluidic device (scale bar = 5  $\mu\text{m}$ ). (D) Meiosis occurs in diploid cells. The chromosomes duplicate and homologous chromosomes exchange genetic information before a first division, called meiosis I. The daughter cells divide again in meiosis II. Finally, four haploid cells are produced with half the chromosome number of the parental cell.

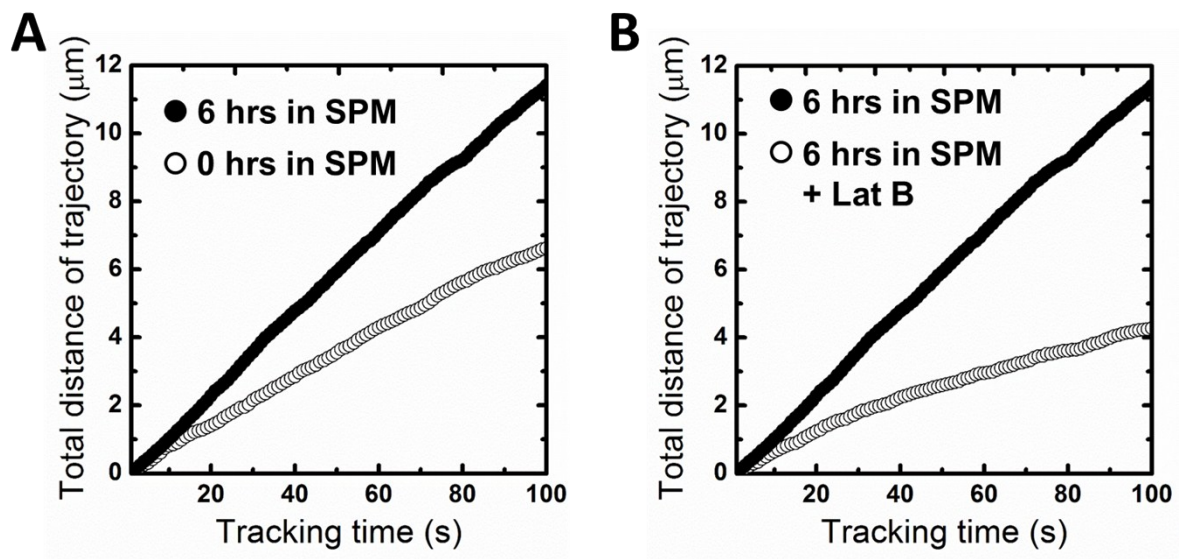

**Fig. S3** (A) Total distances traversed by prophase meiotic chromosomes in SPM medium before treatment and 6 hours following treatment. (B) Analysis of the total distance of trajectory of TetR-GFP movement at the prophase meiotic chromosome without or with treatment with 20  $\mu\text{M}$  LatB.

## Supplementary movie legends

**Movie S1** *TetR*–GFP movement in 0 hour SPM medium.

**Movie S2** *TetR*–GFP movement in 6 hour SPM medium.

**Movie S3** Movement of *Nup49*-GFP.

**Movie S4** 3 dimensional image of chromosome (*Zip1*–GFP).

**Movie S5** *Zip1*–GFP movement in 6 hour SPM medium.

**Movie S6** *Zip1*–GFP movement with treatment of LatB in 6 hour SPM medium.
